# Supplementary material for: Accumulation of Linoleic Acid by Altered Peroxisome Proliferator-Activated Receptor-α Signaling Is Associated with Age-Dependent Hepatocarcinogenesis in Ppara Transgenic Mice
Source: MDPI journal article supplement (doi:10.3390/metabo13080936), 2023-08-10
Supplement: s1 [file s1]

# Figure S1

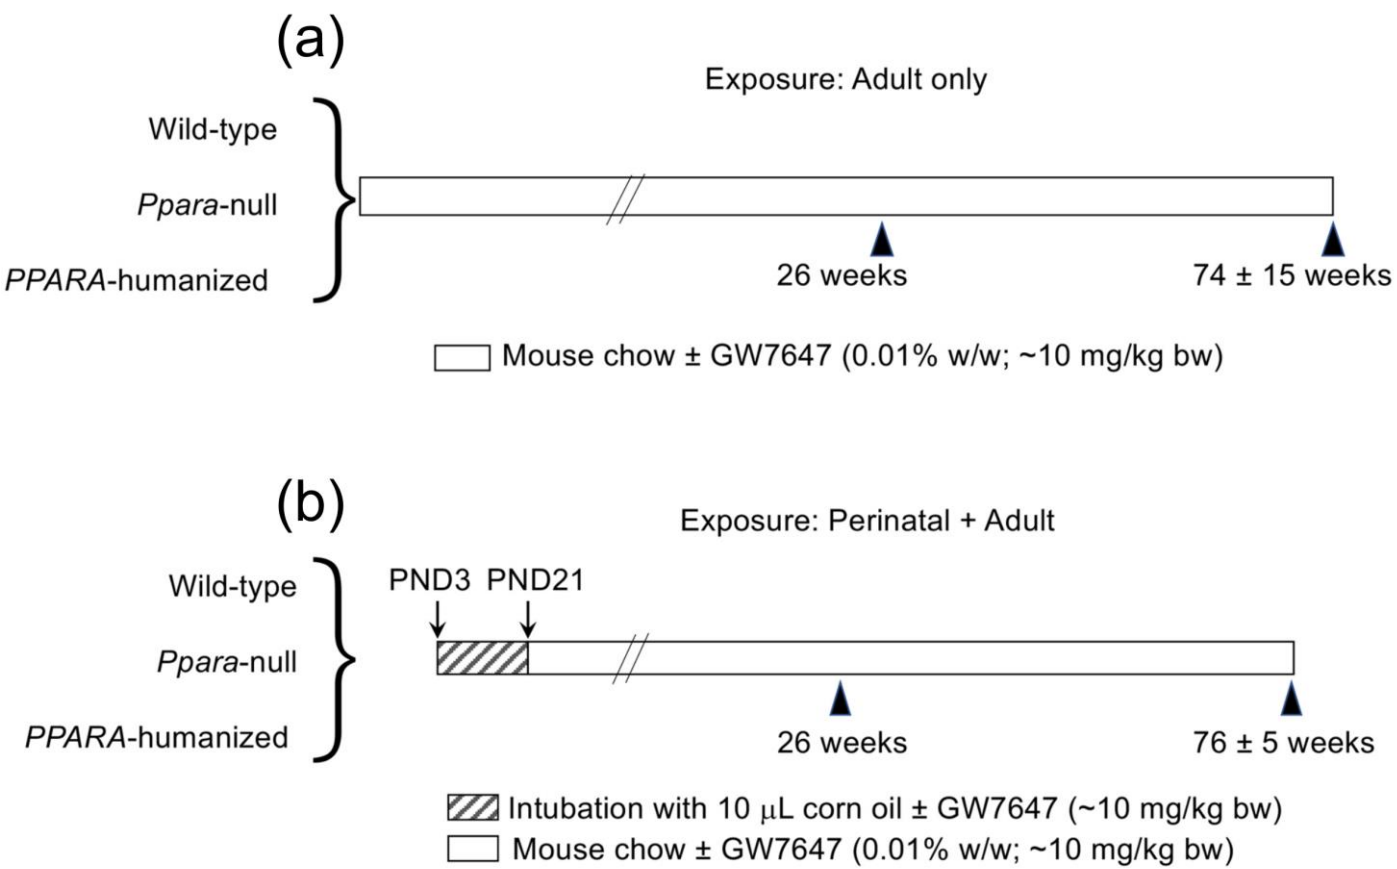

**Figure S1.** Schematic of two treatment paradigms. “Adult only” (Upper panel, a): Adult male wild-type, *Ppara*-null or *PPARA*-humanized mice were fed either a control diet or one containing 0.001% GW7647 for either 26 weeks or ~75 weeks, and tissues examined at each time point. “Perinatal + adult” (Lower panel, b): Postnatal day 3 male wild-type, *Ppara*-null or *PPARA*-humanized mouse neonates were gavaged with either corn oil (vehicle control) or GW7647 (10 mg/kg) until weaning. Cohorts of neonatal pups were weaned at the age of 3 weeks. After weaning, mice were then fed either a control diet or one containing 0.001% GW7647 to provide for examination after a total of either 26 weeks or ~75 weeks administration.

# Figure S2

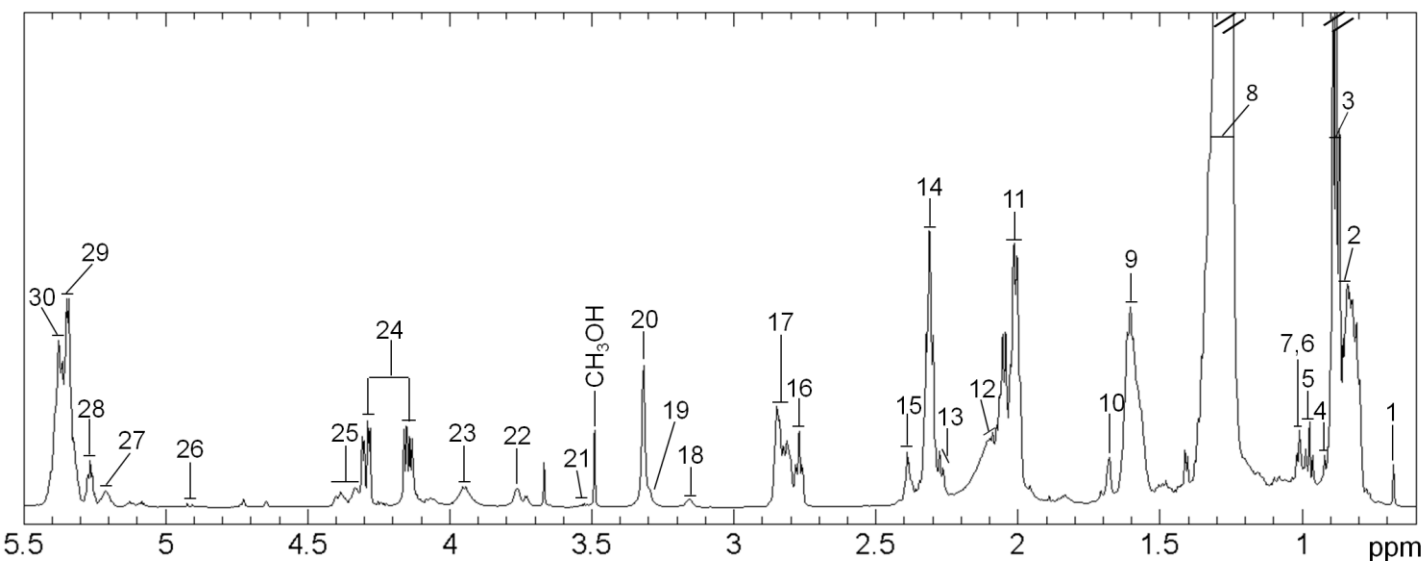

**Figure S2.** Representative 600 MHz  $^1\text{H}$ -NMR spectrum of lipophilic mouse liver extract. Keys: 1. Total cholesterol ( $\text{C}_{18}\text{H}_3$ ), s; 2. Total cholesterol ( $\text{C}_{26}\text{H}_3$ ,  $\text{C}_{27}\text{H}_3$ ), d; 3. Fatty acid residues ( $\text{R}-\text{CH}_3$ ), t; 4. Total cholesterol ( $\text{C}_{21}\text{H}_3$ ), d; 5. Fatty acid residues ( $\omega$ -3,  $\text{R}-\text{CH}_3$  of DHA, EPA, ALA,  $\text{R}-\text{CH}=\text{CH}-\text{CH}_2-\text{CH}_3$ ), t; 6. Free cholesterol ( $\text{C}_{19}\text{H}_3$ ), s; 7. Esterified cholesterol ( $\text{C}_{19}\text{H}_3$ ), s; 8. Fatty acid residues ( $(-\text{CH}_2-)_n$ ); 9. Fatty acid residues ( $\text{R}-\text{CH}_2-\text{CH}_2-\text{COO}-$ ); 10. Fatty acid residues ( $\beta-\text{CH}_2$  of ARA, EPA;  $-\text{CH}=\text{CH}-\text{CH}_2-\text{CH}_2-\text{CH}_2-\text{COO}-$ ); 11. Fatty acid residues ( $-\text{CH}_2-\text{CH}=\text{CH}-(\text{CH}_2-\text{CH}=\text{CH}-)_n-\text{CH}_2-$ ); 12. Fatty acid residues ( $\gamma-\text{CH}_2$  of ARA, EPA;  $-\text{CH}=\text{CH}-\text{CH}_2-\text{CH}_2-\text{CH}_2-\text{COO}$ ); 13. Monoglycerides (FA,  $\text{RH}-\text{CH}_2-\text{CO}-\text{O}-\text{C}_2$ ); 14. Fatty acid residues ( $-\text{CO}-\text{CH}_2$ ); 15. Fatty acid ( $\alpha$  and  $\beta-\text{CH}_2$  of DHA,  $-\text{CH}=\text{CH}-\text{CH}_2-\text{CH}_2-\text{COO}$ ); 16. Fatty acid residues ( $-\text{CH}=\text{CH}-\text{CH}_2-\text{CH}=\text{CH}-$  of linoleic acid); 17. FA, PUFA ( $-\text{CH}=\text{CH}-\text{CH}_2-(\text{CH}=\text{CH}-\text{CH}_2)_n$ ); 18. Phosphatidylethanolamine ( $-\text{CH}_2-\text{NH}_2$ ); 19. Sphingomyelin ( $-\text{CH}_2-\text{N}-(\text{CH}_3)_3$ ); 20. Phosphatidylcholine ( $-\text{CH}_2-\text{N}-(\text{CH}_3)_3$ ); 21. Cholesterol ( $-\text{C}_3\text{H}-\text{OH}$ ); 22. Phosphatidylcholine ( $-\text{N}-\text{CH}_2-$ ); 23. Glycerophospholipids backbone ( $\text{C}_3\text{H}_2$ ); 24. Triglycerides ( $\text{C}_1\text{H}$  and  $\text{C}_3\text{H}$  of glycerol); 25. Phosphatidylcholine ( $-\text{P}-\text{O}-\text{CH}_2-$ ); 26. Esterified cholesterol ( $-\text{C}_3\text{H}-\text{OH}$ ); 27. Glycerophospholipid backbone ( $\text{C}_2\text{H}$ ); 28. Triglycerides ( $\text{C}_2\text{H}$  of glycerol); 29. Fatty acid residues ( $-\text{CH}=\text{CH}-$ ); 30. Cholesterol ( $\text{C}_6\text{H}$ ). DHA, docosahexaenoic acid; EPA, eicosapentaenoic acid; ALA, alpha-linolenic acid; ARA, arachidonic acid.

Figure S3

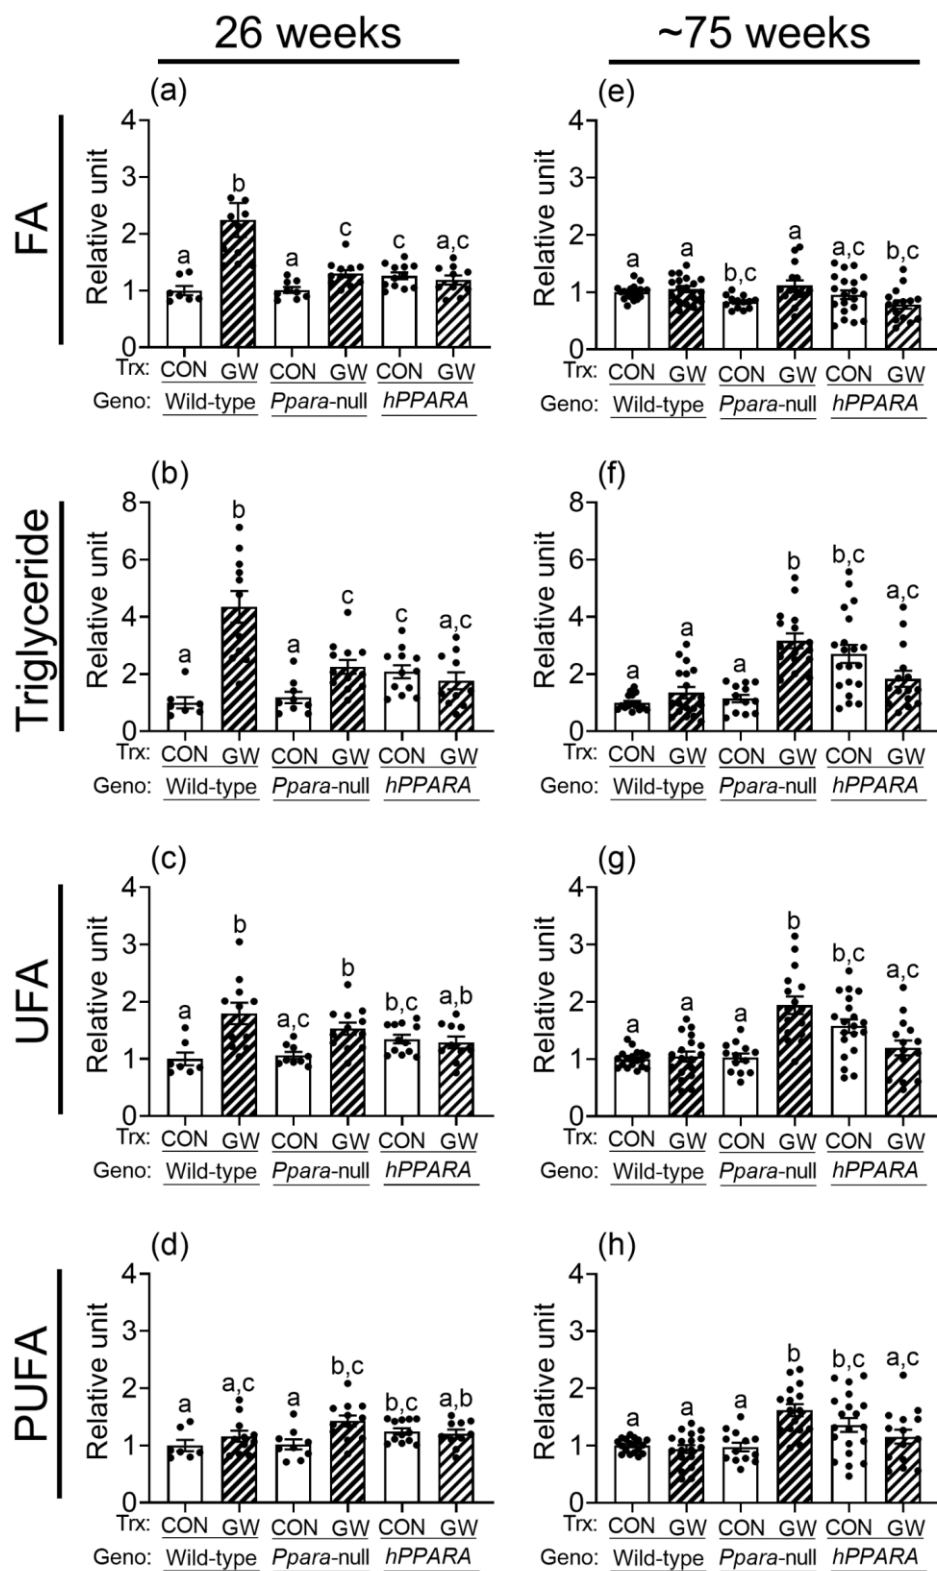

**Figure S3.** Relative levels of fatty acids (a and e), triglycerides (b and f), unsaturated fatty acids (UFA; c and g), or polyunsaturated fatty acids (PUFA; d and h) in lipophilic liver extracts from “perinatal + adult” groups of wild-type, *Ppara*-null or *PPARA*-humanized mice with or without ligand activation of PPAR $\alpha$  after 26 weeks (a-d) or ~75 weeks (e-h). Fatty acid residues ( $R-CH_3$ ), triglycerides ( $C_1H$  and  $C_3H$  of glycerol), unsaturated fatty acid (UFA) residues ( $-CH=CH-$ ), polyunsaturated fatty acid (PUFA) residues ( $-CH=CH-CH_2-(CH=CH-CH_2)_n$ ). The relative average amount of lipids in the liver of mice with different treatments was normalized to wild-type control and represents the fold change. Values represent the mean  $\pm$  S.E.M. Groups with different superscript letters are significantly different at  $P \leq 0.05$ . (One-way ANOVA followed by Tukey's multiple comparisons test).

Figure S4

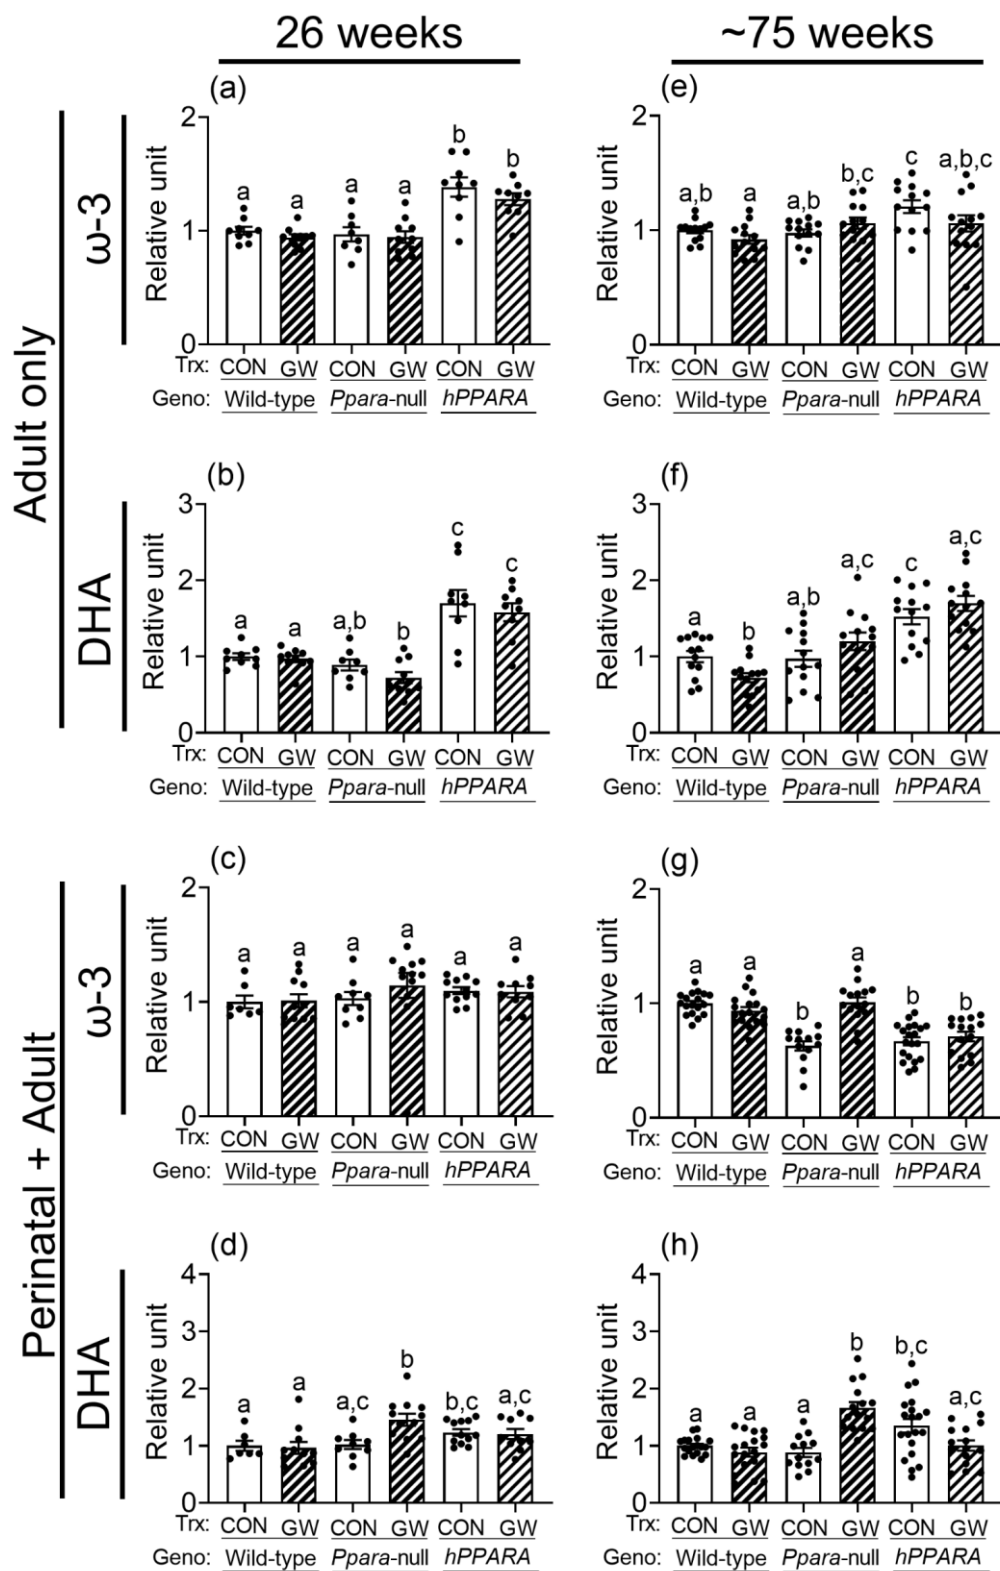

**Figure S4.** Relative average concentration of  $\omega$ -3 fatty acids (a, c, e, g) or docosahexaenoic acid (DHA; b, d, f, h), in lipophilic liver extracts from "adult only" and "perinatal + adult" groups of wild-type, *Ppara*-null or *PPARA*-humanized mice with or without ligand activation of PPAR $\alpha$  with GW7647 after 26 weeks (left panels) or ~75 weeks (right panels). The relative amount of lipids in liver was normalized to wild-type control and represents the fold change. Values represent the mean  $\pm$  S.E.M. Groups with different superscript letters are significantly different at  $P \leq 0.05$ . (One-way ANOVA followed by Tukey's multiple comparisons test).

# Figure S5

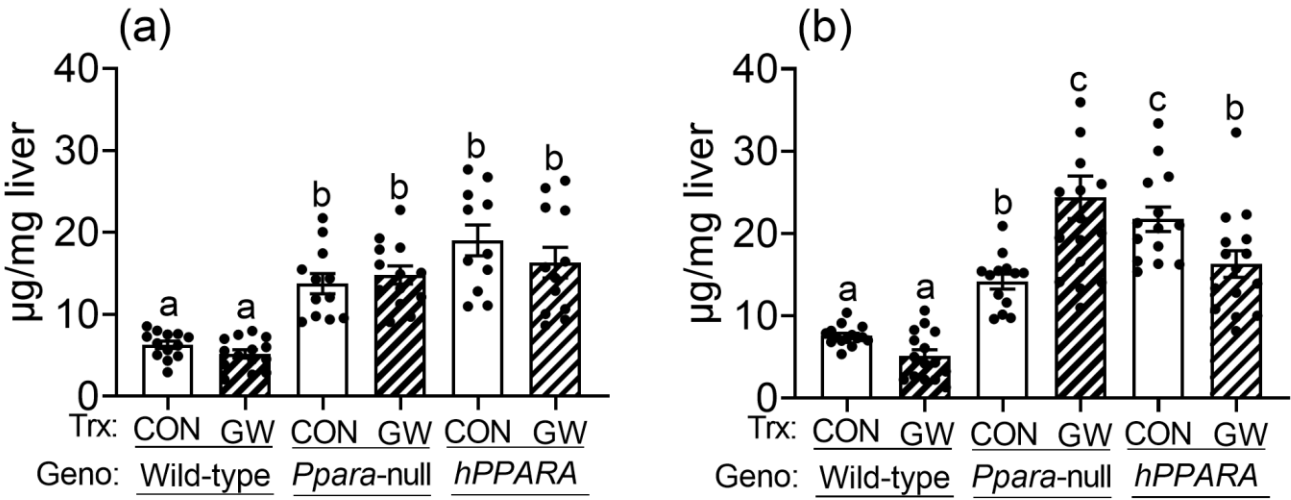

**Figure S5.** Determining liver linoleic acid with GC-MS in liver from “adult only” (a) and “perinatal + adult” (b) groups of wild-type, *Ppara*-null or *PPARA*-humanized mice with or without ligand activation of PPAR $\alpha$  after ~75 weeks. Values represent the mean  $\pm$  S.E.M. Groups with different superscript letters are significantly different at  $P \leq 0.05$ . (One-way ANOVA followed by Tukey’s multiple comparisons test).

# Figure S6

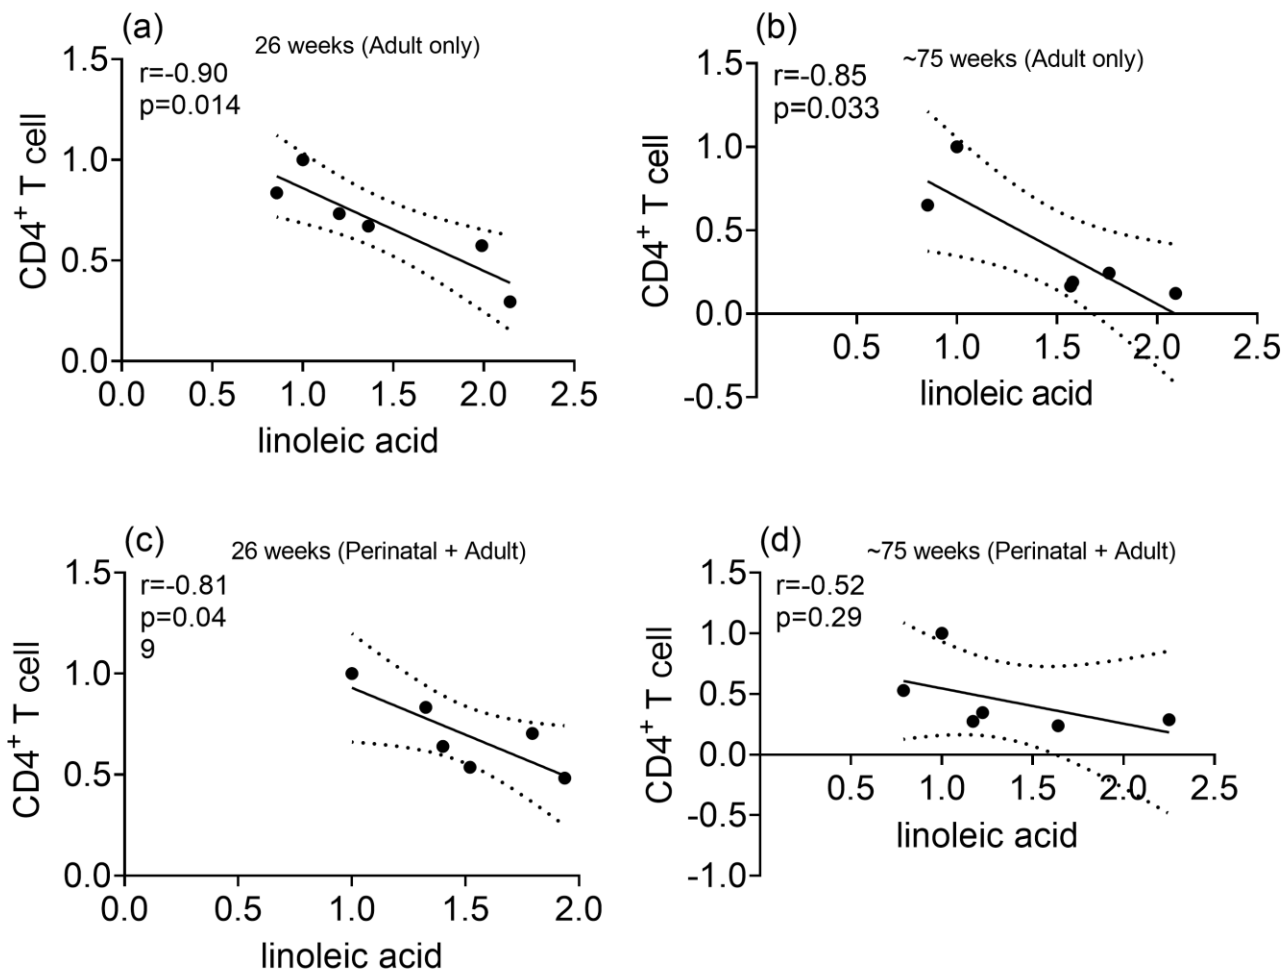

**Figure S6.** Correlation between liver linoleic acid concentration and the number of CD4<sup>+</sup> T cells in liver of in “adult only” (upper panels) and “perinatal + adult” (lower panels) groups of wild-type, *Ppara*-null or *PPARA*-humanized mice after 26 weeks (left panels) or ~75 weeks (right panels).
