# Supplementary material for: Accumulation of Linoleic Acid by Altered Peroxisome Proliferator-Activated Receptor-α Signaling Is Associated with Age-Dependent Hepatocarcinogenesis in Ppara Transgenic Mice
Source: MDPI journal article supplement (doi:10.3390/metabo13080936), 2023-08-10
Supplement: s1 [file s1]

Table S1. Summary of other significantly changed liver lipids in mice of groups, when compared with wild-type control or wild-type GW7647 treated group after 26 weeks administration (Adult only).

| Residues of metabolites                                                                                      | 26 weeks (adult) |                |                |                |                |                |                |                |                |
|--------------------------------------------------------------------------------------------------------------|------------------|----------------|----------------|----------------|----------------|----------------|----------------|----------------|----------------|
|                                                                                                              | B <sup>A</sup>   | C <sup>A</sup> | D <sup>A</sup> | E <sup>A</sup> | F <sup>A</sup> | C <sup>B</sup> | D <sup>B</sup> | E <sup>B</sup> | F <sup>B</sup> |
| 1. Total cholesterol (C <sub>18</sub> H <sub>3</sub> ), s                                                    | –                |                | +              | –              | –              | +              | +              |                |                |
| 2. Total cholesterol (C <sub>26</sub> H <sub>3</sub> , C <sub>27</sub> H <sub>3</sub> ), d                   |                  |                |                |                |                |                |                |                |                |
| 4. Total cholesterol (C <sub>21</sub> H <sub>3</sub> ), d                                                    |                  |                |                |                |                |                |                |                |                |
| 6. Free cholesterol (C <sub>19</sub> H <sub>3</sub> ), s                                                     | –                |                |                | –              | –              | +              | +              |                |                |
| 7. Esterified cholesterol (C <sub>19</sub> H <sub>3</sub> ), s                                               | –                |                |                | –              | –              | +              | +              | +              |                |
| 9. Fatty acid -CH <sub>2</sub> -CH <sub>2</sub> -COO                                                         | +                |                | +              | +              | +              | –              | –              | –              |                |
| 10. Fatty acid -CH=CH-CH <sub>2</sub> -CH <sub>2</sub> -CH <sub>2</sub> -COO                                 | –                |                | +              | –              | –              | +              | +              | +              |                |
| 11. Fatty acid -CH <sub>2</sub> -CH=CH-(CH <sub>2</sub> -CH=CH-) <sub>n</sub> CH <sub>2</sub>                | +                |                |                | +              | +              | –              | –              | –              | –              |
| 12. Fatty acid (γ-CH <sub>2</sub> of ARA, EPA) -CH=CH-CH <sub>2</sub> -CH <sub>2</sub> -CH <sub>2</sub> -COO |                  |                | –              |                |                |                |                |                |                |
| 13. Monoglycerides (FA, RH-CH <sub>2</sub> -CO-O-C <sub>2</sub> )                                            | –                |                |                | –              | –              | +              | +              |                | –              |
| 14. Fatty acid –CO-CH <sub>2</sub>                                                                           | +                |                | –              | +              | +              | –              | –              |                |                |
| 18. Phosphatidylethanolamine -CH <sub>2</sub> -NH <sub>2</sub>                                               | –                |                |                | –              | –              | +              | +              |                | –              |
| 19. Sphingomyelin -CH <sub>2</sub> -N-(CH <sub>3</sub> ) <sub>3</sub>                                        | –                |                |                | –              | –              | +              | +              |                |                |
| 20. Phosphatidylcholine -CH <sub>2</sub> -N-(CH <sub>3</sub> ) <sub>3</sub>                                  | –                |                | –              | –              | –              | +              | +              |                | –              |
| 21. Cholesterol 3-CHOH                                                                                       |                  |                |                |                |                |                |                |                |                |
| 22. Phosphatidylcholine -N-CH <sub>2</sub> -                                                                 | –                |                |                | –              | –              | +              | +              |                | –              |
| 23. Total phospholipids, glycerol (C <sub>3</sub> H <sub>2</sub> )                                           | –                |                | –              | –              | –              | +              | +              |                | –              |
| 25. Phosphatidylcholine -PO-CH <sub>2</sub> -                                                                | –                |                | –              | –              | –              | +              |                |                | –              |
| 26. Esterified cholesterol 3-CHOH                                                                            | –                |                | –              | –              | –              | +              |                | +              |                |
| 27. DG-2, Glycerophospholipid backbone 2-CH                                                                  | –                |                |                | –              | –              | +              |                |                | –              |
| 30. Cholesterol C <sub>6</sub> H                                                                             | –                |                |                | –              | –              | +              | +              | +              |                |

A, control, wild-type mice without treatment; B group, wild-type mice with GW7647 treatment; C group, *Ppara*-null mice without treatment; D group, *Ppara*-null mice with GW7647 treatment; E group, *hPPARA* mice without treatment; F group, *hPPARA* mice with GW7647 treatment. B<sup>A</sup>, C<sup>A</sup>, D<sup>A</sup>, E<sup>A</sup>, F<sup>A</sup>, corresponding groups compared with wild-type control; C<sup>B</sup>, D<sup>B</sup>, E<sup>B</sup>, F<sup>B</sup>, corresponding groups compared with wild-type GW7647 treated groups. +, significantly increased; –, significantly decreased.

Table S2. Summary of other significantly changed liver lipids in mice of groups, when compared with wild-type control or wild-type GW7647 treated group after ~75 weeks administration (Adult only).

| Residues of metabolites                                                                                      | Long term (adult) |                |                |                |                |                |                |                |                |
|--------------------------------------------------------------------------------------------------------------|-------------------|----------------|----------------|----------------|----------------|----------------|----------------|----------------|----------------|
|                                                                                                              | B <sup>A</sup>    | C <sup>A</sup> | D <sup>A</sup> | E <sup>A</sup> | F <sup>A</sup> | C <sup>B</sup> | D <sup>B</sup> | E <sup>B</sup> | F <sup>B</sup> |
| 1. Total cholesterol (C <sub>18</sub> H <sub>3</sub> ), s                                                    | +                 |                |                | –              |                |                |                |                |                |
| 2. Total cholesterol (C <sub>26</sub> H <sub>3</sub> , C <sub>27</sub> H <sub>3</sub> ), d                   |                   |                |                |                |                |                |                |                |                |
| 4. Total cholesterol (C <sub>21</sub> H <sub>3</sub> ), d                                                    |                   |                |                |                |                |                |                |                |                |
| 6. Free cholesterol (C <sub>19</sub> H <sub>3</sub> ), s                                                     |                   |                |                | –              |                |                |                |                |                |
| 7. Esterified cholesterol (C <sub>19</sub> H <sub>3</sub> ), s                                               | –                 |                |                | –              | –              | +              | +              | +              | +              |
| 9. Fatty acid -CH <sub>2</sub> -CH <sub>2</sub> -COO                                                         | +                 |                |                | +              | +              |                |                | +              |                |
| 10. Fatty acid -CH=CH-CH <sub>2</sub> -CH <sub>2</sub> -CH <sub>2</sub> -COO                                 | +                 |                |                |                |                | +              |                | +              |                |
| 11. Fatty acid -CH <sub>2</sub> -CH=CH-(CH <sub>2</sub> -CH=CH-) <sub>n</sub> CH <sub>2</sub>                |                   |                |                | +              | +              |                |                |                |                |
| 12. Fatty acid (γ-CH <sub>2</sub> of ARA, EPA) -CH=CH-CH <sub>2</sub> -CH <sub>2</sub> -CH <sub>2</sub> -COO |                   |                |                |                |                |                |                |                |                |
| 13. Monoglycerides (FA, RH-CH <sub>2</sub> -CO-O-C <sub>2</sub> )                                            | –                 |                |                | –              |                |                |                |                |                |
| 14. Fatty acid –CO-CH <sub>2</sub>                                                                           |                   |                |                | +              | +              |                | +              | +              |                |
| 18. Phosphatidylethanolamine -CH <sub>2</sub> -NH <sub>2</sub>                                               |                   |                |                |                |                |                |                |                |                |
| 19. Sphingomyelin -CH <sub>2</sub> -N-(CH <sub>3</sub> ) <sub>3</sub>                                        |                   |                |                |                |                |                |                |                |                |
| 20. Phosphatidylcholine -CH <sub>2</sub> -N-(CH <sub>3</sub> ) <sub>3</sub>                                  |                   |                |                |                |                |                |                |                |                |
| 21. Cholesterol 3-CHOH                                                                                       |                   |                |                |                |                |                |                |                |                |
| 22. Phosphatidylcholine -N-CH <sub>2</sub> -                                                                 |                   |                |                |                |                |                |                |                |                |
| 23. Total phospholipids, glycerol (C <sub>3</sub> H <sub>2</sub> )                                           |                   |                |                |                |                |                |                |                |                |
| 25. Phosphatidylcholine -PO-CH <sub>2</sub> -                                                                |                   |                |                |                |                |                |                |                |                |
| 26. Esterified cholesterol 3-CHOH                                                                            | –                 |                |                | –              | –              | +              | +              | +              | +              |
| 27. DG-2, Glycerophospholipid backbone 2-CH                                                                  | +                 |                |                |                |                | –              | –              | –              |                |
| 30. Cholesterol C <sub>6</sub> H                                                                             |                   |                |                |                |                |                |                |                |                |

A, control, wild-type mice without treatment; B group, wild-type mice with GW7647 treatment; C group, *Ppara*-null mice without treatment; D group, *Ppara*-null mice with GW7647 treatment; E group, *hPPARA* mice without treatment; F group, *hPPARA* mice with GW7647 treatment. B<sup>A</sup>, C<sup>A</sup>, D<sup>A</sup>, E<sup>A</sup>, F<sup>A</sup>, corresponding groups compared with wild-type control; C<sup>B</sup>, D<sup>B</sup>, E<sup>B</sup>, F<sup>B</sup>, corresponding groups compared with wild-type GW7647 treated groups. +, significantly increased; –, significantly decreased.

Table S3. Summary of other significantly changed liver lipids in mice of groups, when compared with wild-type control or wild-type GW7647 treated group after 26 weeks administration (Perinatal + Adult).

| Residues of metabolites                                                                                      | 26 weeks (perinatal) |                |                |                |                |                |                |                |                |
|--------------------------------------------------------------------------------------------------------------|----------------------|----------------|----------------|----------------|----------------|----------------|----------------|----------------|----------------|
|                                                                                                              | B <sup>A</sup>       | C <sup>A</sup> | D <sup>A</sup> | E <sup>A</sup> | F <sup>A</sup> | C <sup>B</sup> | D <sup>B</sup> | E <sup>B</sup> | F <sup>B</sup> |
| 1. Total cholesterol (C <sub>18</sub> H <sub>3</sub> ), s                                                    | –                    |                |                | –              |                | +              | +              |                |                |
| 2. Total cholesterol (C <sub>26</sub> H <sub>3</sub> , C <sub>27</sub> H <sub>3</sub> ), d                   |                      |                |                |                |                |                |                |                |                |
| 4. Total cholesterol (C <sub>21</sub> H <sub>3</sub> ), d                                                    |                      |                |                |                |                |                |                |                |                |
| 6. Free cholesterol (C <sub>19</sub> H <sub>3</sub> ), s                                                     | –                    |                | –              | –              |                | +              | +              | +              | +              |
| 7. Esterified cholesterol (C <sub>19</sub> H <sub>3</sub> ), s                                               | –                    |                | –              | –              |                | +              | +              | +              | +              |
| 9. Fatty acid -CH <sub>2</sub> -CH <sub>2</sub> -COO                                                         | +                    |                | +              | +              |                | –              | –              | –              | –              |
| 10. Fatty acid -CH=CH-CH <sub>2</sub> -CH <sub>2</sub> -CH <sub>2</sub> -COO                                 | –                    |                | –              | –              |                | +              | +              | +              | +              |
| 11. Fatty acid -CH <sub>2</sub> -CH=CH-(CH <sub>2</sub> -CH=CH-) <sub>n</sub> CH <sub>2</sub>                | +                    |                |                | +              |                | –              | –              | –              | –              |
| 12. Fatty acid (γ-CH <sub>2</sub> of ARA, EPA) -CH=CH-CH <sub>2</sub> -CH <sub>2</sub> -CH <sub>2</sub> -COO | –                    |                |                |                |                | +              | +              | +              | +              |
| 13. Monoglycerides (FA, RH-CH <sub>2</sub> -CO-O-C <sub>2</sub> )                                            | –                    |                | –              | –              |                | +              |                | +              | +              |
| 14. Fatty acid –CO-CH <sub>2</sub>                                                                           | +                    |                | +              | +              |                | –              | –              | –              | –              |
| 18. Phosphatidylethanolamine -CH <sub>2</sub> -NH <sub>2</sub>                                               | –                    |                | –              | –              |                | +              |                |                |                |
| 19. Sphingomyelin -CH <sub>2</sub> -N-(CH <sub>3</sub> ) <sub>3</sub>                                        | –                    |                | –              |                |                | +              |                |                |                |
| 20. Phosphatidylcholine -CH <sub>2</sub> -N-(CH <sub>3</sub> ) <sub>3</sub>                                  | –                    |                | –              | –              |                | +              |                | +              | +              |
| 21. Cholesterol 3-CHOH                                                                                       |                      |                |                |                |                |                |                |                |                |
| 22. Phosphatidylcholine -N-CH <sub>2</sub> -                                                                 | –                    |                | –              | –              |                | +              |                |                |                |
| 23. Total phospholipids, glycerol (C <sub>3</sub> H <sub>2</sub> )                                           | –                    |                | –              | –              |                | +              | +              |                | +              |
| 25. Phosphatidylcholine -PO-CH <sub>2</sub> -                                                                | –                    |                | –              | –              |                | +              |                | +              | +              |
| 26. Esterified cholesterol 3-CHOH                                                                            | –                    |                | –              | –              |                | +              |                | +              | +              |
| 27. DG-2, Glycerophospholipid backbone 2-CH                                                                  | –                    |                | –              | –              |                | +              |                | +              |                |
| 30. Cholesterol C <sub>6</sub> H                                                                             | –                    |                | +              | +              |                | +              | +              | +              | +              |

A, control, wild-type mice without treatment; B group, wild-type mice with GW7647 treatment; C group, *Ppara*-null mice without treatment; D group, *Ppara*-null mice with GW7647 treatment; E group, *hPPARA* mice without treatment; F group, *hPPARA* mice with GW7647 treatment. B<sup>A</sup>, C<sup>A</sup>, D<sup>A</sup>, E<sup>A</sup>, F<sup>A</sup>, corresponding groups compared with wild-type control; C<sup>B</sup>, D<sup>B</sup>, E<sup>B</sup>, F<sup>B</sup>, corresponding groups compared with wild-type GW7647 treated groups. +, significantly increased; –, significantly decreased.

Table S4. Summary of other significantly changed liver lipids in mice of groups, when compared with wild-type control or wild-type GW7647 treated group after ~75 weeks administration (Perinatal + Adult).

| Residues of metabolites                                                                                      | Long term (perinatal) |                |                |                |                |                |                |                |                |
|--------------------------------------------------------------------------------------------------------------|-----------------------|----------------|----------------|----------------|----------------|----------------|----------------|----------------|----------------|
|                                                                                                              | B <sup>A</sup>        | C <sup>A</sup> | D <sup>A</sup> | E <sup>A</sup> | F <sup>A</sup> | C <sup>B</sup> | D <sup>B</sup> | E <sup>B</sup> | F <sup>B</sup> |
| 1. Total cholesterol (C <sub>18</sub> H <sub>3</sub> ), s                                                    |                       | +              |                |                | +              |                |                |                |                |
| 2. Total cholesterol (C <sub>26</sub> H <sub>3</sub> , C <sub>27</sub> H <sub>3</sub> ), d                   |                       |                |                |                |                |                |                |                |                |
| 4. Total cholesterol (C <sub>21</sub> H <sub>3</sub> ), d                                                    |                       |                |                |                |                |                |                |                |                |
| 6. Free cholesterol (C <sub>19</sub> H <sub>3</sub> ), s                                                     |                       |                |                |                |                |                |                |                |                |
| 7. Esterified cholesterol (C <sub>19</sub> H <sub>3</sub> ), s                                               | –                     | +              |                |                |                | +              | +              | +              |                |
| 9. Fatty acid -CH <sub>2</sub> - CH <sub>2</sub> -COO                                                        |                       | +              | +              | +              |                |                | +              | +              |                |
| 10. Fatty acid -CH=CH-CH <sub>2</sub> -CH <sub>2</sub> -CH <sub>2</sub> -COO                                 |                       |                |                |                |                | +              | +              | +              |                |
| 11. Fatty acid -CH <sub>2</sub> -CH=CH-(CH <sub>2</sub> -CH=CH-) <sub>n</sub> CH <sub>2</sub>                | +                     |                | +              |                |                |                |                |                | –              |
| 12. Fatty acid (γ-CH <sub>2</sub> of ARA, EPA) -CH=CH-CH <sub>2</sub> -CH <sub>2</sub> -CH <sub>2</sub> -COO |                       |                | +              |                |                |                | +              |                |                |
| 13. Monoglycerides (FA, RH-CH <sub>2</sub> -CO-O-C <sub>2</sub> )                                            |                       |                |                |                |                |                |                |                | –              |
| 14. Fatty acid –CO-CH <sub>2</sub>                                                                           |                       |                | +              | +              | +              |                | +              | +              |                |
| 18. Phosphatidylethanolamine -CH <sub>2</sub> -NH <sub>2</sub>                                               |                       |                |                |                |                |                |                |                | –              |
| 19. Sphingomyelin -CH <sub>2</sub> -N-(CH <sub>3</sub> ) <sub>3</sub>                                        |                       |                |                |                |                | +              |                |                |                |
| 20. Phosphatidylcholine -CH <sub>2</sub> -N-(CH <sub>3</sub> ) <sub>3</sub>                                  |                       | +              |                | +              | +              |                |                |                | –              |
| 21. Cholesterol 3-CHOH                                                                                       |                       |                |                |                |                |                |                |                |                |
| 22. Phosphatidylcholine -N-CH <sub>2</sub> -                                                                 |                       |                |                |                | +              |                |                |                | –              |
| 23. Total phospholipids, glycerol (C <sub>3</sub> H <sub>2</sub> )                                           |                       | –              | –              |                | +              |                |                |                | –              |
| 25. Phosphatidylcholine -PO-CH <sub>2</sub> -                                                                |                       |                |                |                | +              |                |                | +              | –              |
| 26. Esterified cholesterol 3-CHOH                                                                            | –                     | +              |                |                |                | +              | +              | +              |                |
| 27. DG-2, Glycerophospholipid backbone 2-CH                                                                  |                       |                |                |                | +              |                |                |                | –              |
| 30. Cholesterol C <sub>6</sub> H                                                                             |                       | +              | +              | +              | +              | +              | +              | +              | +              |

A, control, wild-type mice without treatment; B group, wild-type mice with GW7647 treatment; C group, *Ppara*-null mice without treatment; D group, *Ppara*-null mice with GW7647 treatment; E group, *hPPARA* mice without treatment; F group, *hPPARA* mice with GW7647 treatment. B<sup>A</sup>, C<sup>A</sup>, D<sup>A</sup>, E<sup>A</sup>, F<sup>A</sup>, corresponding groups compared with wild-type control; C<sup>B</sup>, D<sup>B</sup>, E<sup>B</sup>, F<sup>B</sup>, corresponding groups compared with wild-type GW7647 treated groups. +, significantly increased; –, significantly decreased.
